# Supplementary material for: Oxygen migration and optical properties of coronene oxides and their persulfurated derivatives: insight into the electric field effect and the oxygen-site dependence
Source: Royal Society of Chemistry journal article supplement (doi:10.1039/d0cp03381b), 2020-01-01
Supplement: d0cp03381b1.pdf [file d0cp03381b1.pdf]

## Electronic Supplementary Information for

### Oxygen migration and optical properties of the coronene oxides and their persulfurated derivatives: Insight into the electric field effect and the oxygen-site dependence

Qing Zhang, Yuanyan Li, and Zexing Cao\*

*State Key Laboratory of Physical Chemistry of Solid Surfaces and Fujian Provincial Key Laboratory of Theoretical and Computational Chemistry, College of Chemistry and Chemical Engineering, Xiamen University, Xiamen 360015, China*

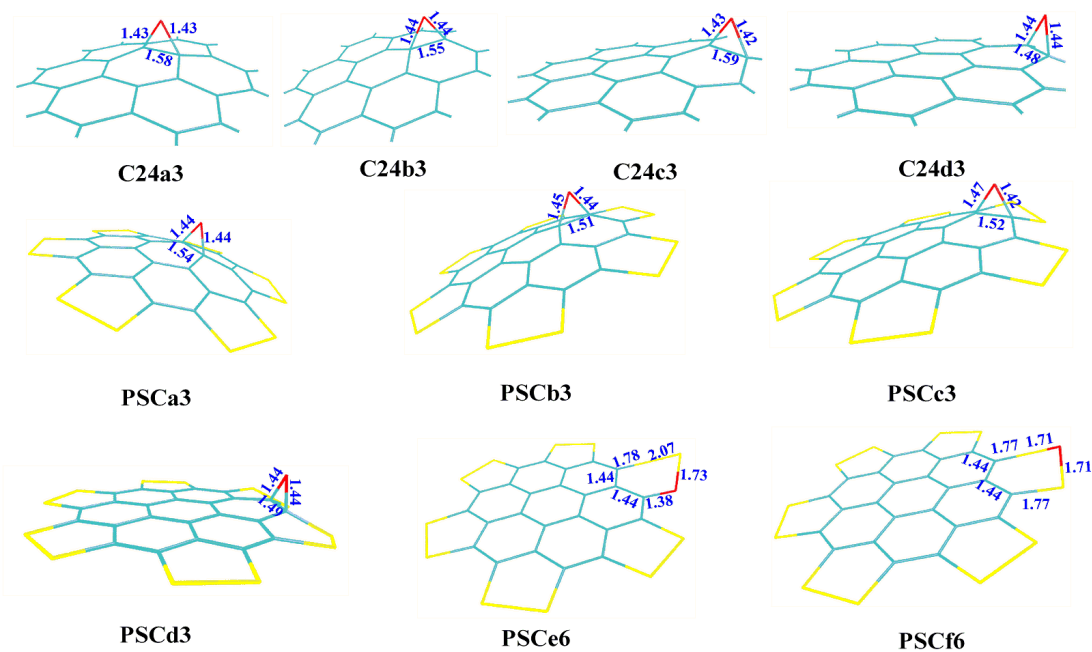

**Fig. S1** The B3LYP-optimized structures of C24 epoxides and PSC oxides.

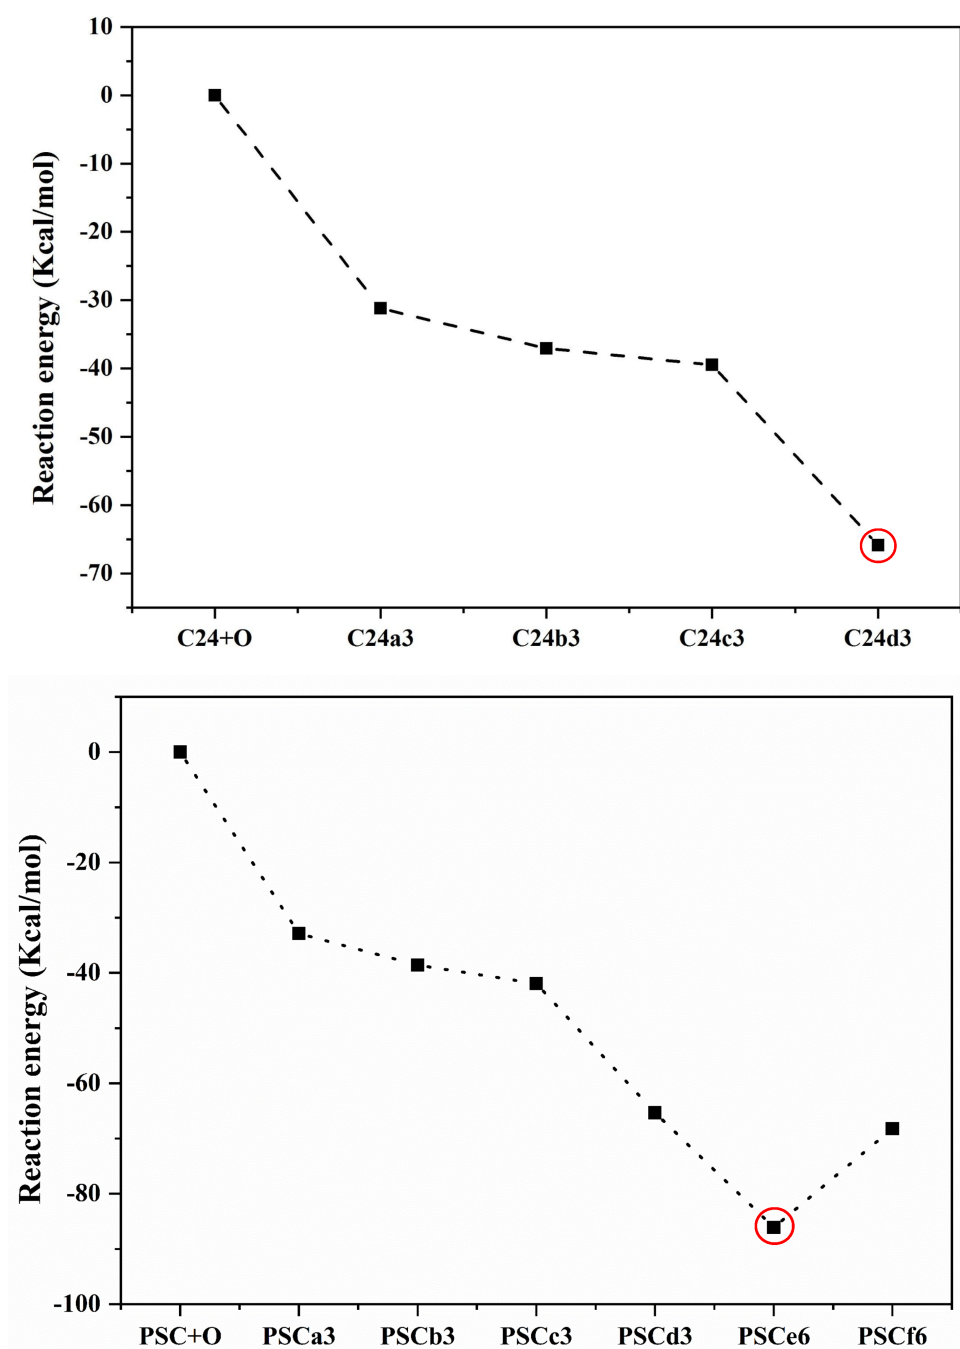

**Fig. S2** Predicted related energies for the C24 epoxides and PSC oxides at the B3LYP/6-31G(d,p) level of theory.

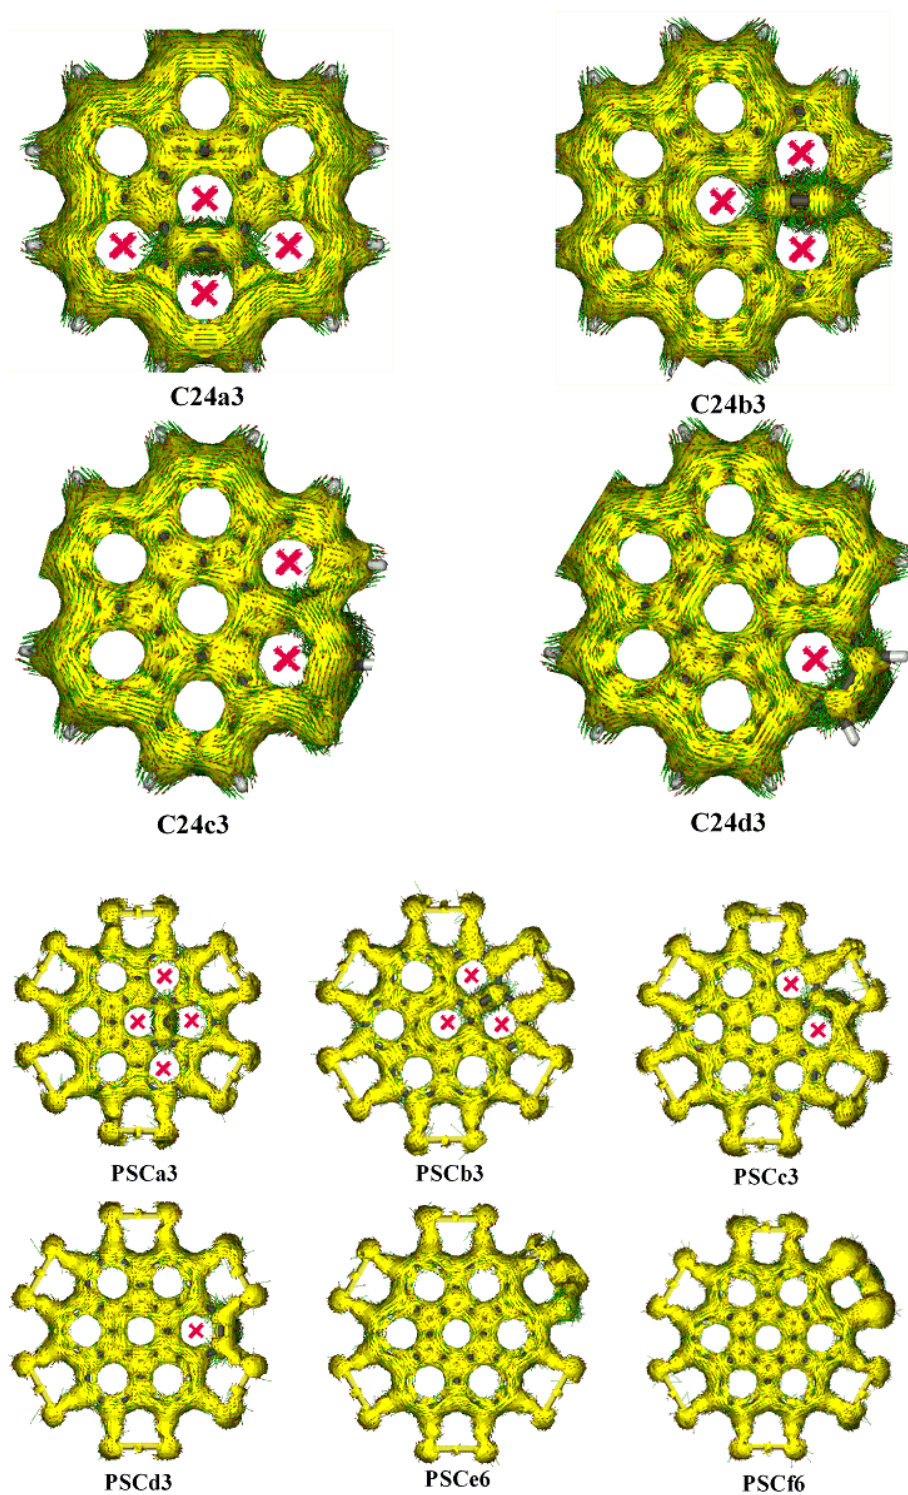

**Fig. S3** The anisotropy of the induced current density (ACID) of the C24 epoxides and PSC oxides, where the red cross indicates the delocalization destruction of  $\pi$  electrons in the inner carbon ring induced by the epoxy group.

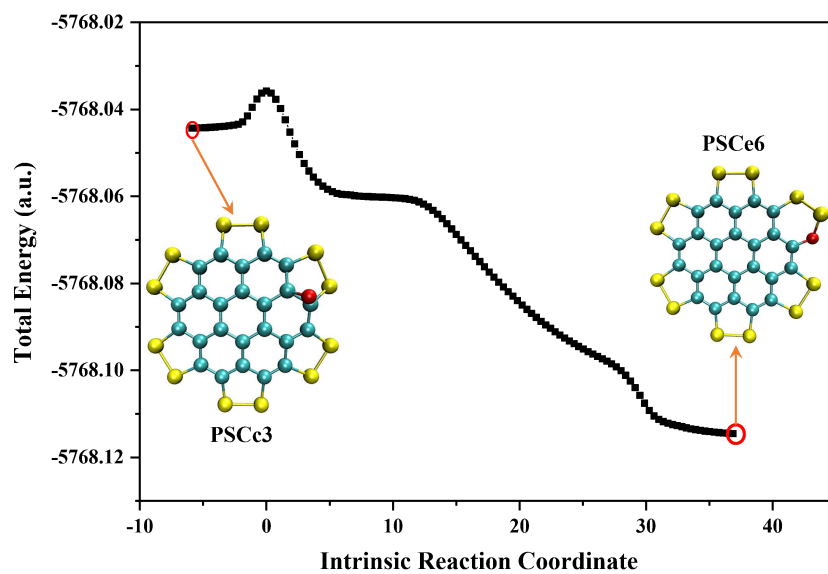

**Fig. S4** Evolution of the total energy along IRC from PSCc3 to PSCe6.

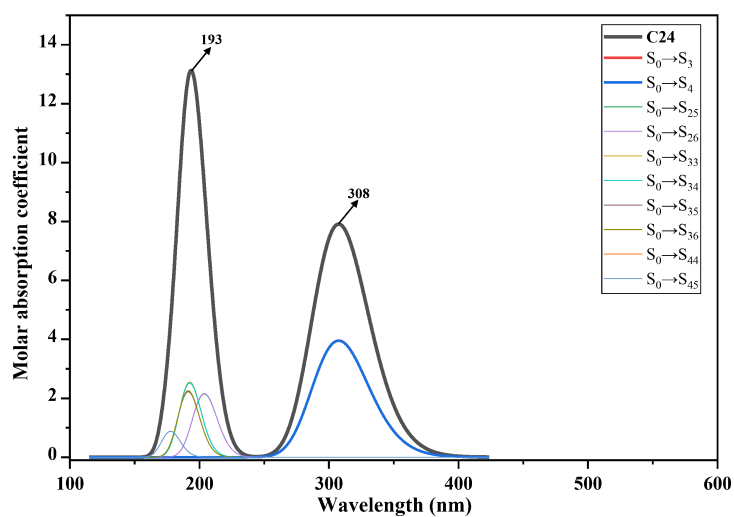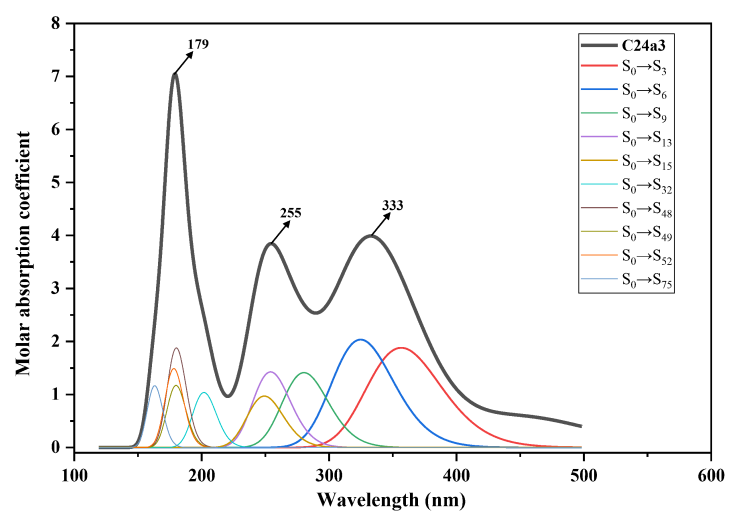



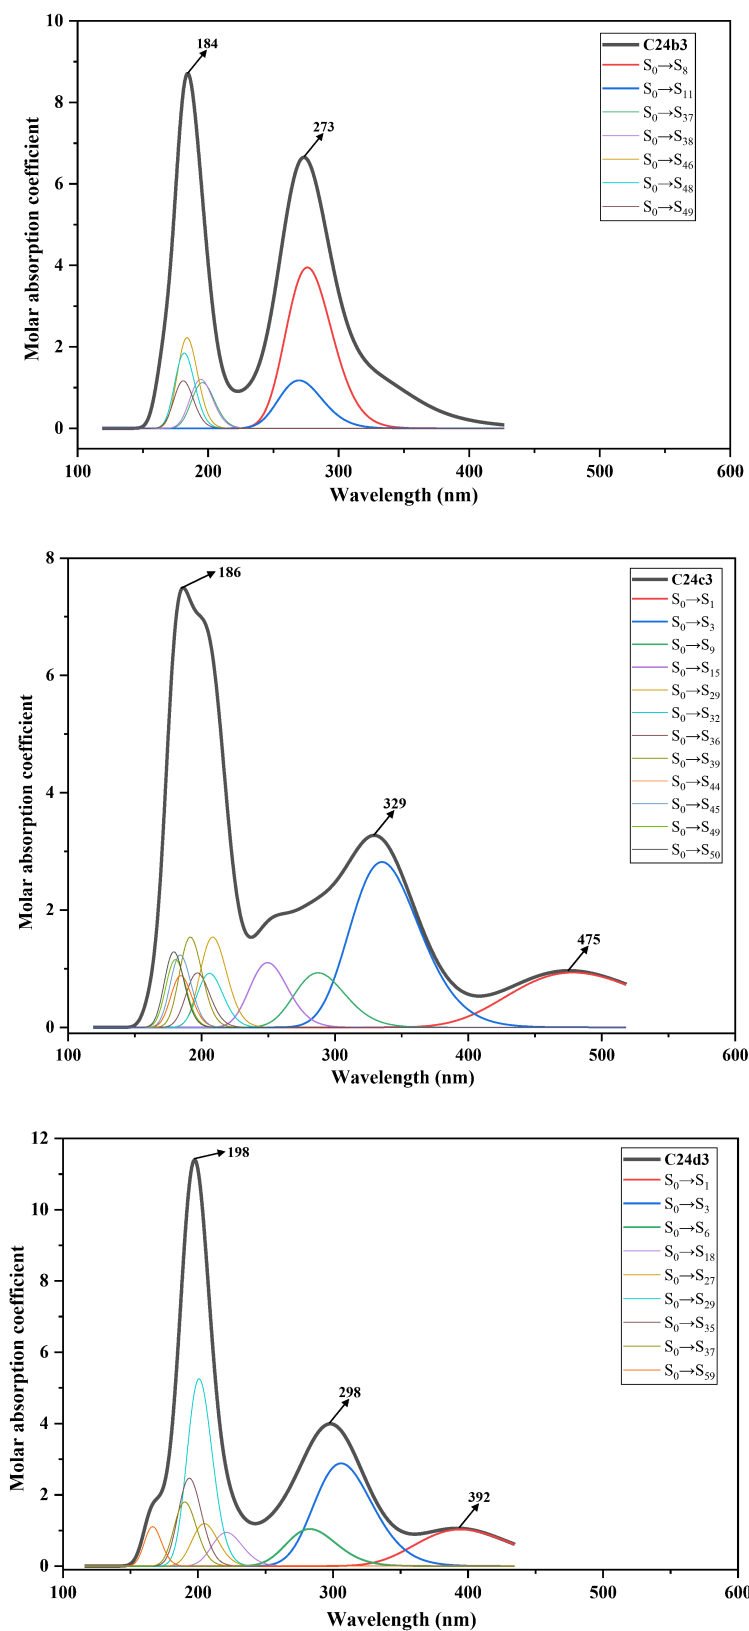

**Fig. S5** The contribution of individual electronic transitions to the absorption spectra of C24 and C24 epoxides, respectively.

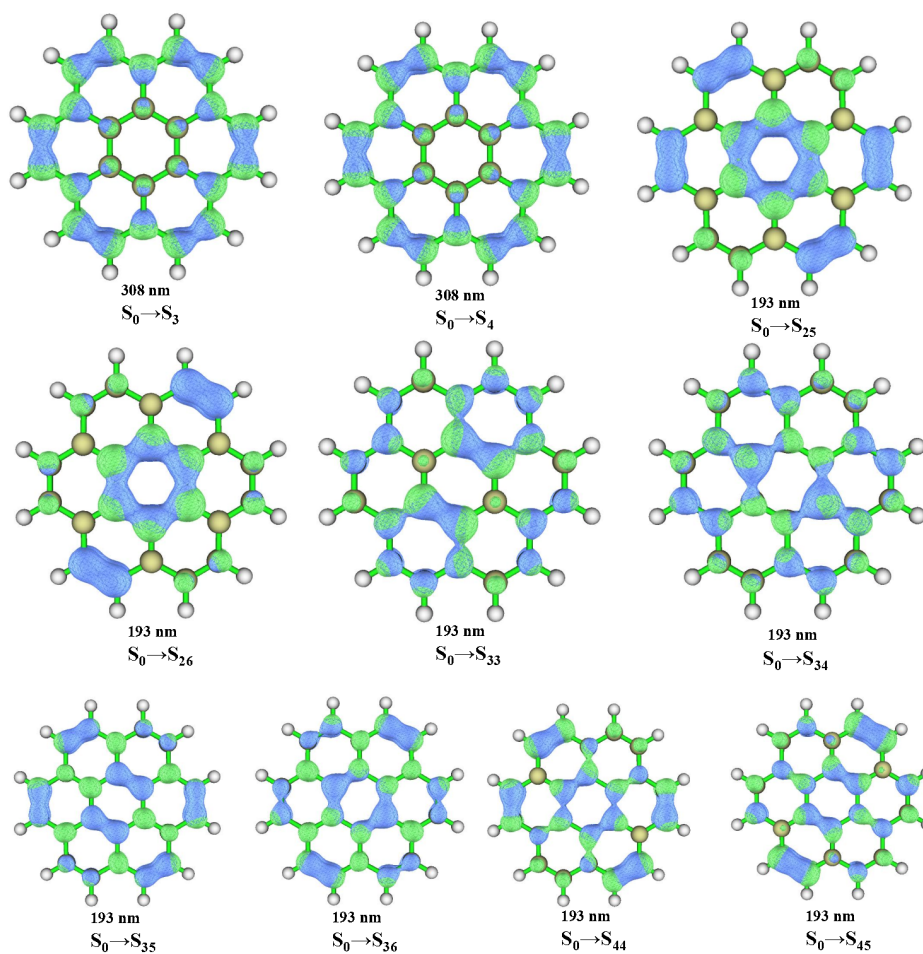

**Fig. S6** Predicted electron-hole distributions of C24 at the  $S_0$ -state geometry, where blue and green isosurfaces represent hole and electron distributions here and in subsequent Figures, respectively.

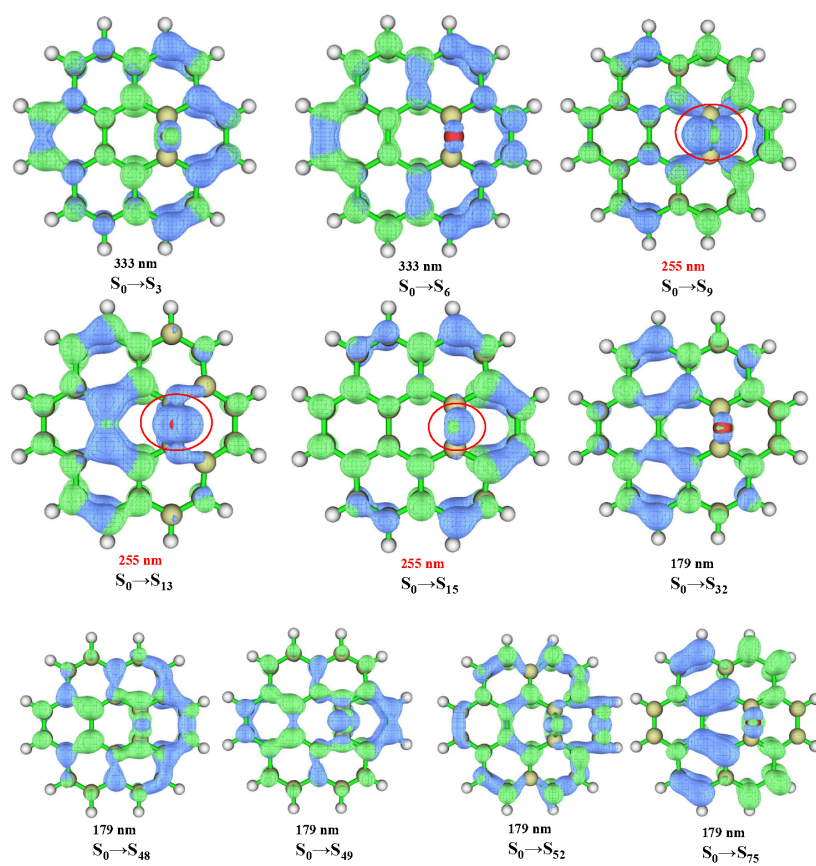

**Fig. S7** Predicted electron-hole distributions of C24a3 at the  $S_0$ -state geometry.

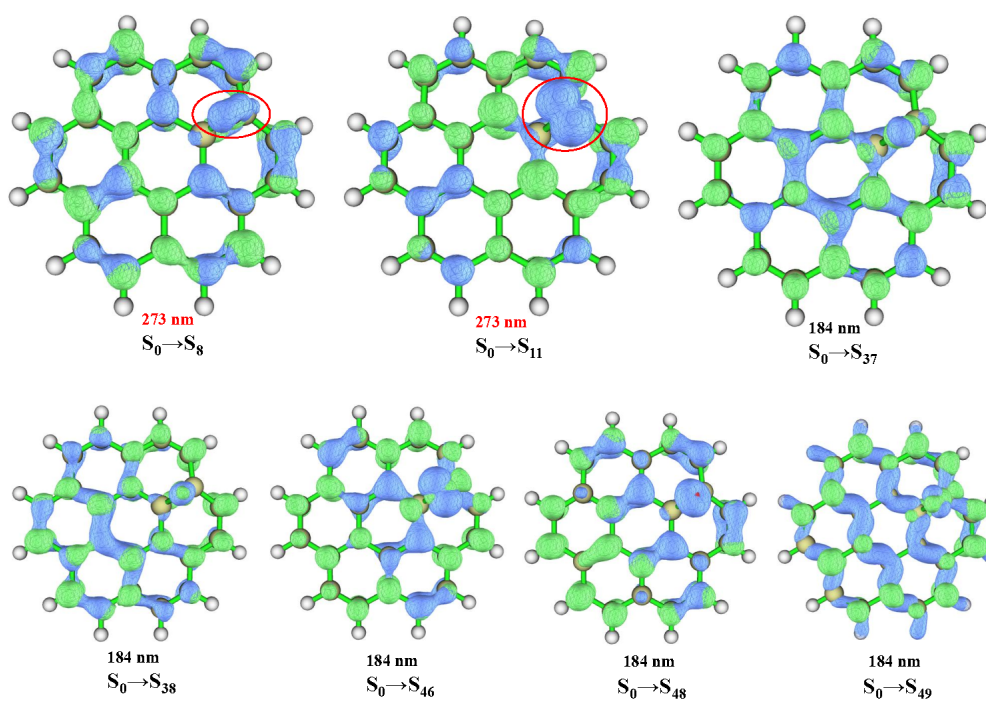

**Fig. S8** Predicted electron-hole distributions of C24b3 at the  $S_0$ -state geometry.

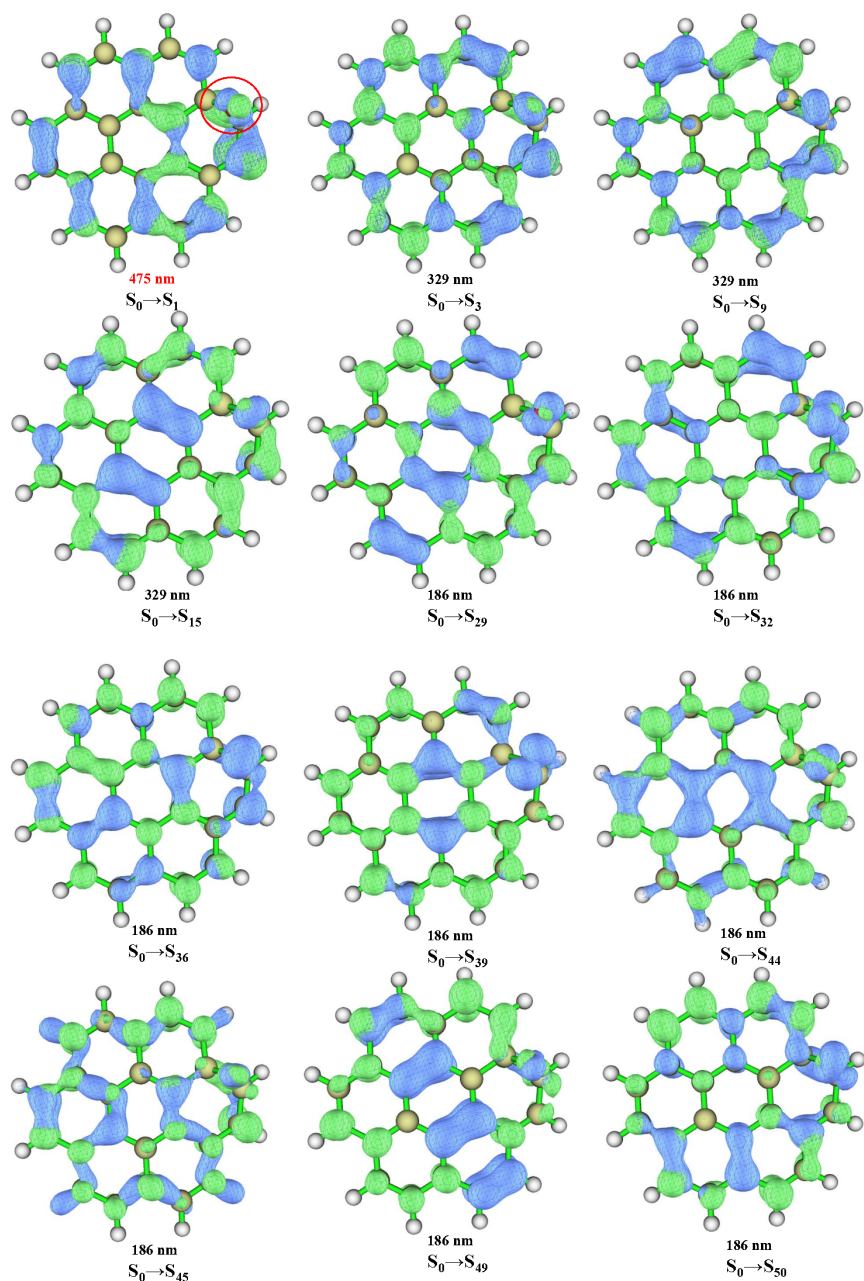

**Fig. S9** Predicted electron-hole distributions of C24c3 at the  $S_0$ -state geometry.



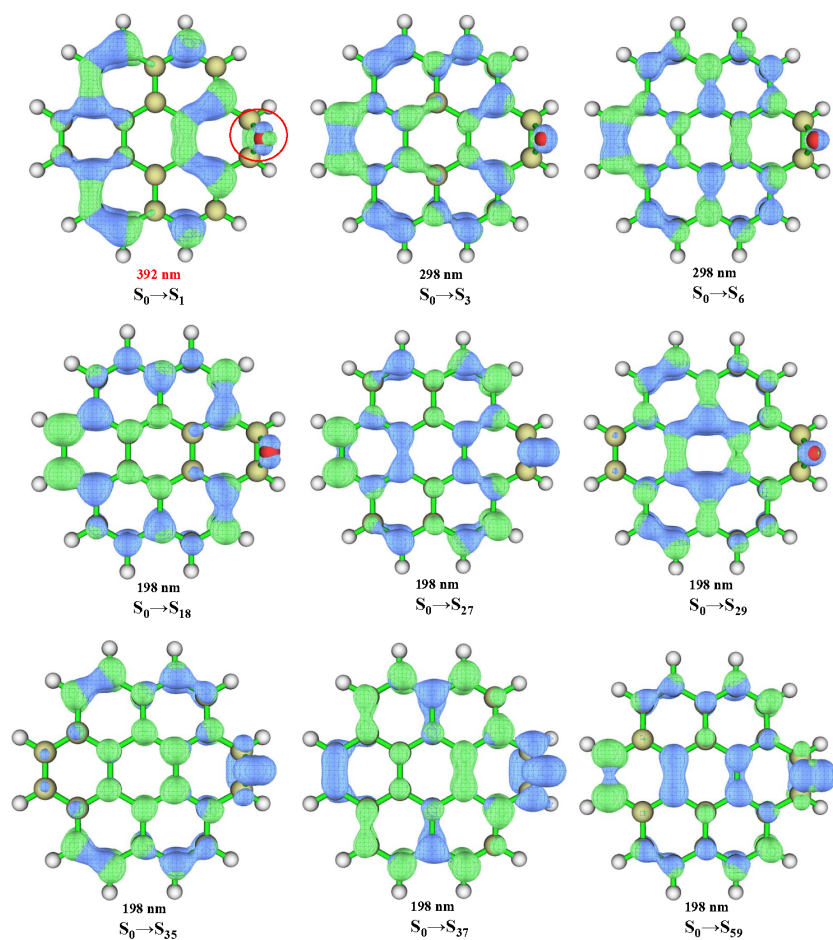

**Fig. S10** Predicted electron-hole distributions of C24d3 at the  $S_0$ -state geometry.

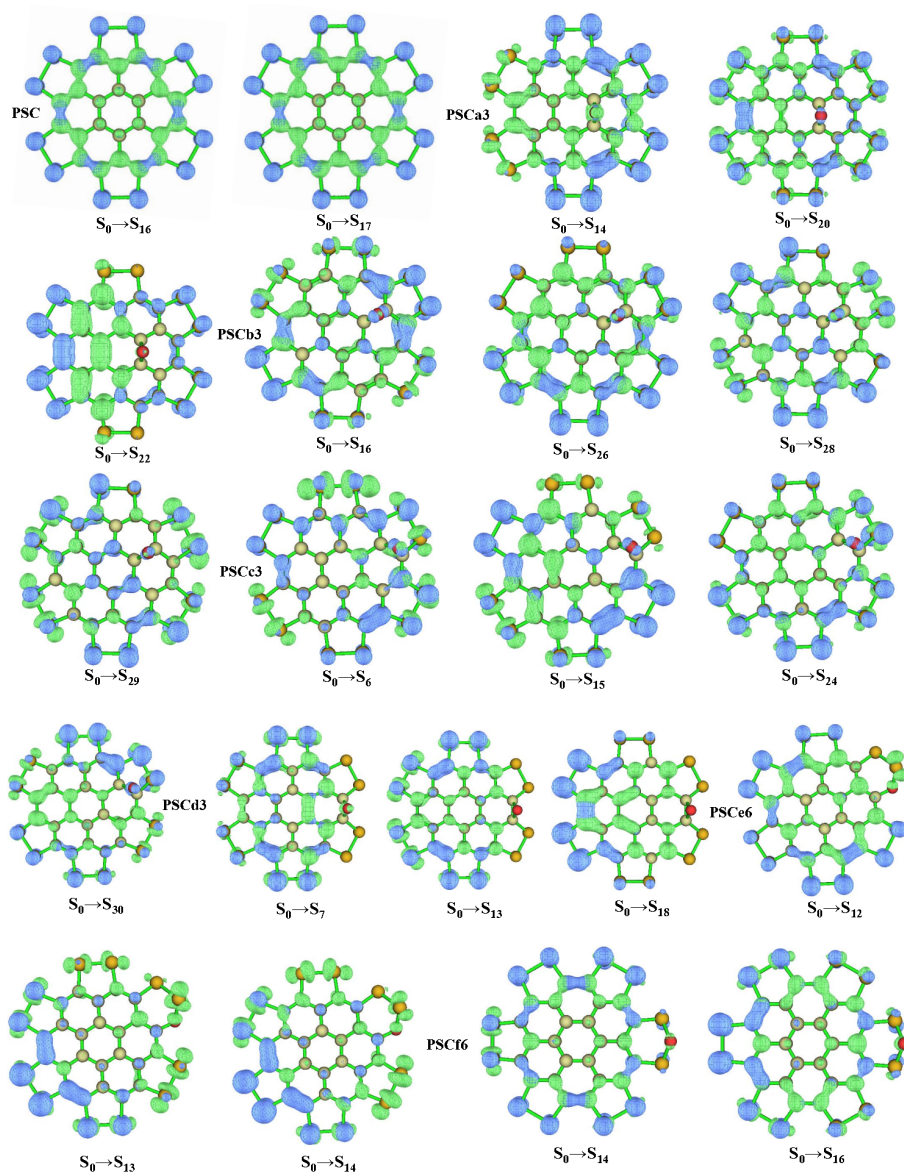

**Fig. S11** Predicted electron-hole distributions of the low-energy transitions for PSC oxides and the pristine PSC, based on the  $S_0$ -state geometry.

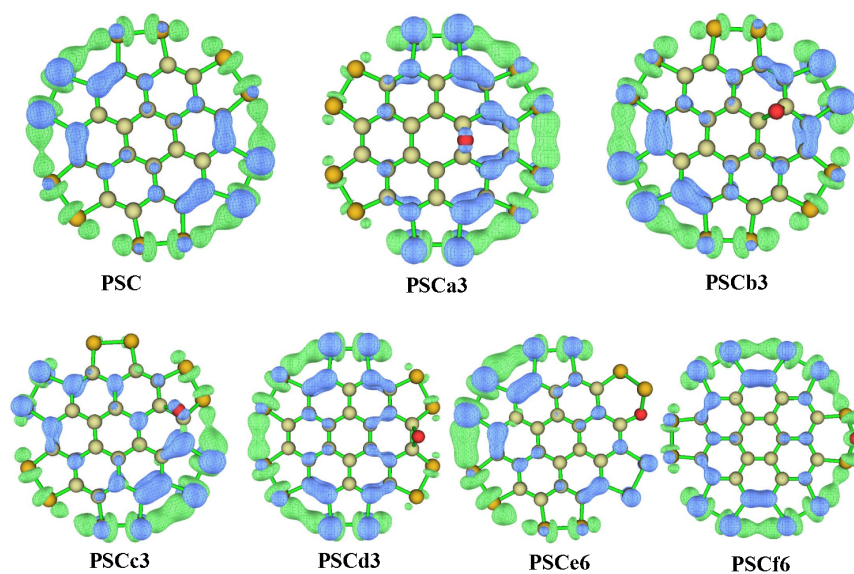

**Fig. S12** Predicted electron-hole distributions of the  $S_0 \rightarrow S_1$  transitions of the PSC oxides and the pristine PSC.

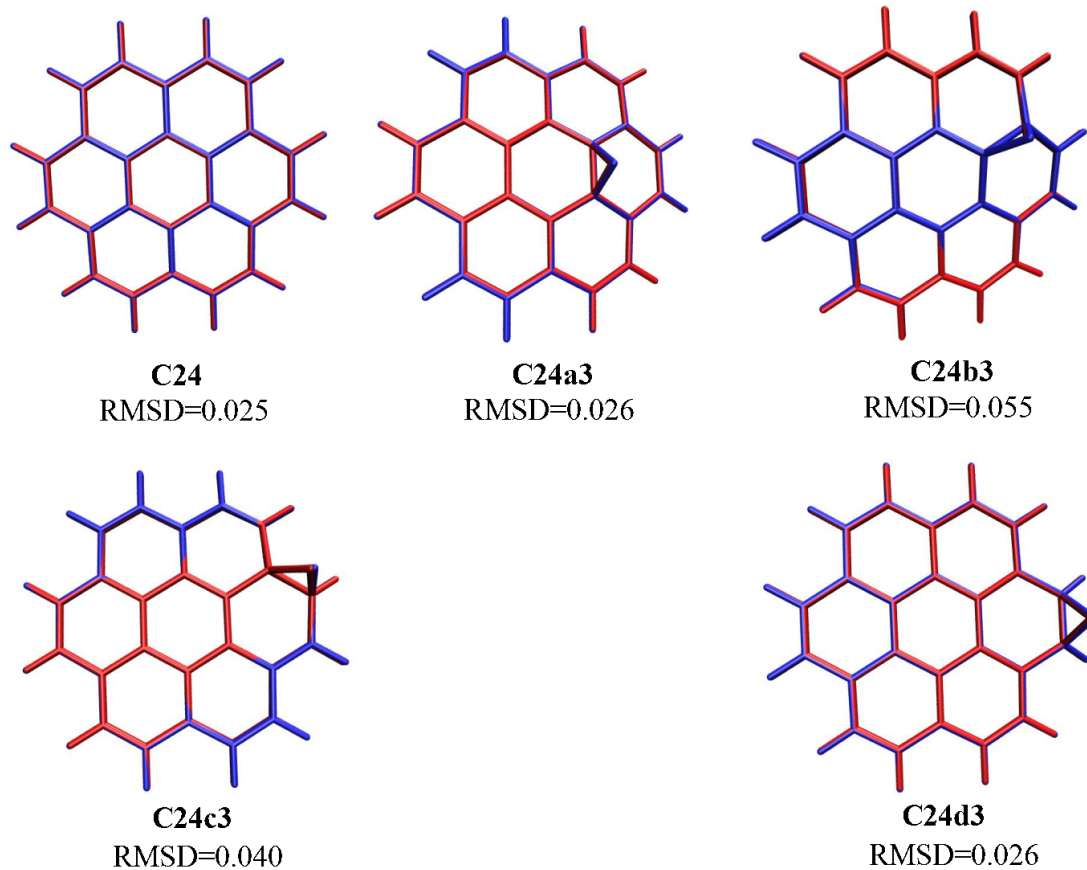

**Fig. S13** Geometry comparison and RMSD values between the CIS (red) and TD-B3LYP optimized (blue)  $S_1$  structures of C24 and its epoxides.

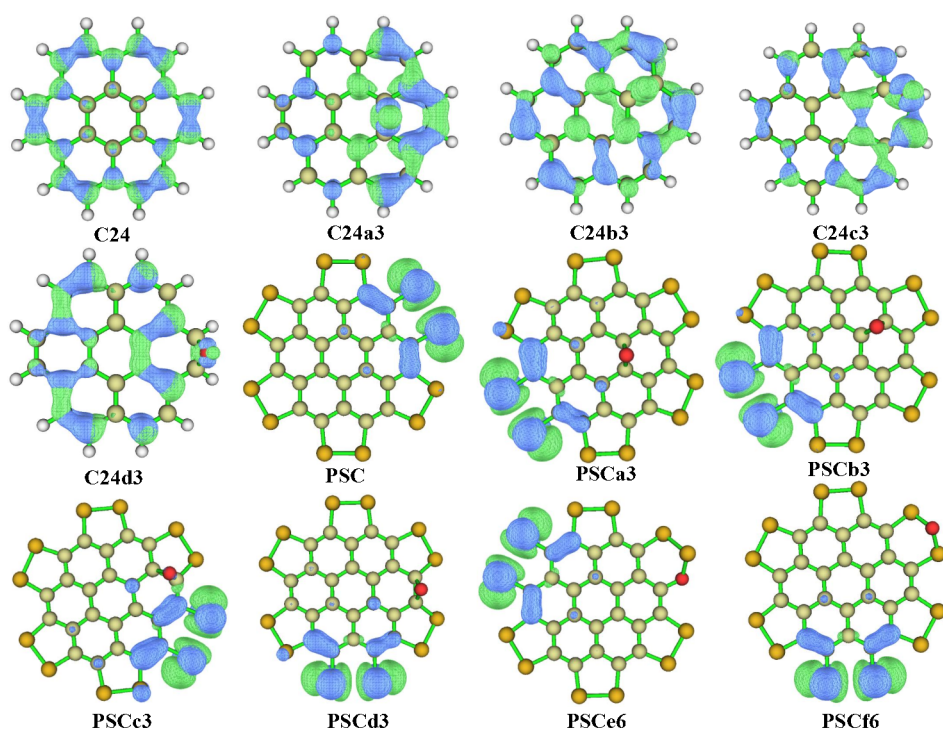

**Fig. S14** Calculated electron-hole distributions of the  $S_1 \rightarrow S_0$  transitions for C24 and PSC and their oxides, based on the relaxed  $S_1$  geometry.



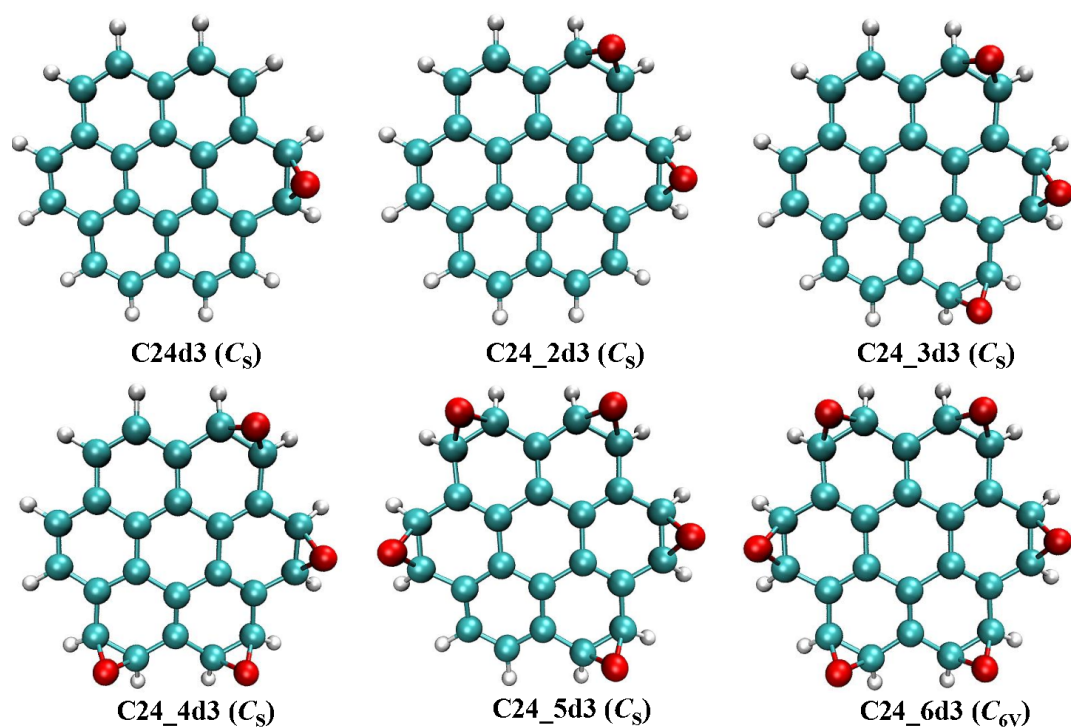

**Fig. S15** Optimized  $S_1$ -relaxed structures of the C24 epoxides with multiple epoxy groups varying from 1 to 6 at the edge position, based on the rim-epoxidized C24d3, in which the molecular symmetry is measured by using Materials Studio software with a tolerance of 0.01 Å.

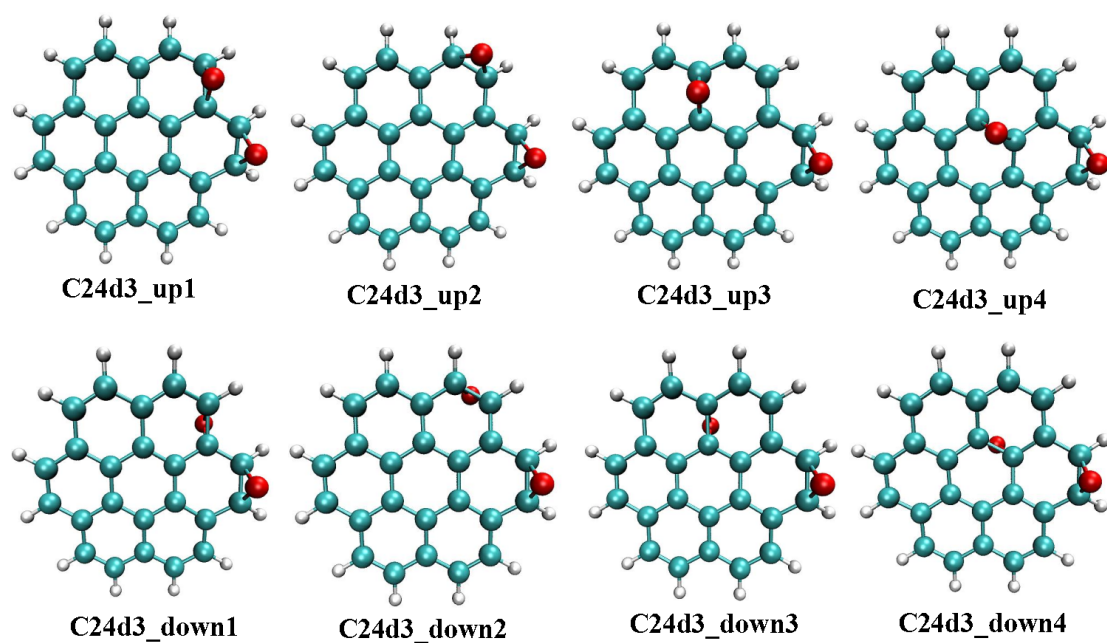

**Fig. S16** The optimized structures of the C<sub>24</sub> epoxides with double epoxy groups bonded on one side or both sides of the basal plane.

**Table S1** The vertical emission energies ( $\Delta E_{\text{emi}}$  and  $\lambda_{\text{emi}}$ ), transition dipole moments ( $\mu$ ) and oscillator strength ( $f$ ) of the PSC oxides and the pristine PSC predicted by the CIS approach.

| Structure | $E_{\text{emi}}(\text{eV})$ | $\lambda_{\text{emi}}(\text{nm})$ | $\mu$ (Debye) | $f$ ( $S_1 \rightarrow S_0$ ) |
|-----------|-----------------------------|-----------------------------------|---------------|-------------------------------|
| PSC       | 0.98                        | 1259                              | 0.03          | 0.000                         |
| PSCa3     | 1.07                        | 1159                              | 0.16          | 0.001                         |
| PSCb3     | 1.11                        | 1120                              | 0.12          | 0.000                         |
| PSCc3     | 0.59                        | 2117                              | 0.11          | 0.000                         |
| PSCd3     | 0.95                        | 1303                              | 0.08          | 0.000                         |
| PSCe6     | 0.99                        | 1254                              | 0.03          | 0.000                         |
| PSCf6     | 1.01                        | 1233                              | 0.03          | 0.000                         |

**Table S2** The predicted vertical emission energies ( $\Delta E_{\text{emi}}$  and  $\lambda_{\text{emi}}$ ), transition dipole moments ( $\mu$ ), oscillator strengths ( $f$ ), and the radiative ( $k_r$ ) and non-radiative decay rates ( $k_{\text{nr}}$ ) of the pristine C24 and C24 epoxides predicted by the  $\omega$ B97XD/6-31g(d,p) method.

|       | $\Delta E_{\text{emi}}$ (eV) | $\lambda_{\text{emi}}$ (nm) | $\mu$ (Debye) | $f(\text{S}_1 \rightarrow \text{S}_0)$ | $k_r$ ( $\text{s}^{-1}$ ) | $k_{\text{nr}}$ ( $\text{s}^{-1}$ ) |
|-------|------------------------------|-----------------------------|---------------|----------------------------------------|---------------------------|-------------------------------------|
| C24   | 3.38                         | 367                         | 0.00          | 0.000                                  | -                         | $1.21 \times 10^8$                  |
| C24a3 | 2.31                         | 537                         | 3.58          | 0.112                                  | $2.60 \times 10^7$        | $3.96 \times 10^9$                  |
| C24b3 | 3.38                         | 366                         | 1.52          | 0.030                                  | $1.47 \times 10^7$        | $2.47 \times 10^{10}$               |
| C24c3 | 2.22                         | 559                         | 4.14          | 0.144                                  | $3.07 \times 10^7$        | $6.84 \times 10^{10}$               |
| C24d3 | 3.20                         | 388                         | 4.54          | 0.250                                  | $1.11 \times 10^8$        | $8.94 \times 10^7$                  |

**Table S3** The predicted vertical emission energies ( $\Delta E_{\text{emi}}$  and  $\lambda_{\text{emi}}$ ), transition dipole moments ( $\mu$ ), oscillator strength ( $f$ ), and the radiative decay rate ( $k_r$ ) and non-radiative rate ( $k_{\text{nr}}$ ) of the C24 epoxides with the epoxy groups varying from 1 to 6.

| Structure | $\Delta E_{\text{emi}}$ (eV) | $\lambda_{\text{emi}}$ (nm) | $\mu$ (Debye) | $f$ ( $S_1 \rightarrow S_0$ ) | $k_r$ ( $s^{-1}$ ) | $k_{\text{nr}}$ ( $s^{-1}$ ) |
|-----------|------------------------------|-----------------------------|---------------|-------------------------------|--------------------|------------------------------|
| C24d3     | 2.86                         | 433                         | 4.15          | 0.187                         | $6.64 \times 10^7$ | $4.81 \times 10^6$           |
| C24_2d3   | 2.59                         | 480                         | 3.63          | 0.129                         | $3.75 \times 10^7$ | $9.65 \times 10^6$           |
| C24_3d3   | 2.68                         | 463                         | 1.68          | 0.029                         | $8.91 \times 10^6$ | $4.45 \times 10^8$           |
| C24_4d3   | 2.53                         | 491                         | 1.27          | 0.016                         | $4.29 \times 10^6$ | $9.80 \times 10^6$           |
| C24_5d3   | 2.59                         | 479                         | 0.73          | 0.005                         | $1.51 \times 10^6$ | $1.46 \times 10^8$           |
| C24_6d3   | 2.55                         | 486                         | 0.00          | 0.000                         | -                  | $1.26 \times 10^7$           |



**Table S4** The predicted vertical emission energies ( $\Delta E_{\text{emi}}$ , eV and  $\lambda_{\text{emi}}$ , nm), transition dipole moments ( $\mu$ , debye) and oscillator strength ( $f$ ) of the C24 epoxides with double epoxy groups bonded on one side or both sides of the basal plane.

| Structure | $\Delta E_{\text{emi}}$ | $\lambda_{\text{emi}}$ | $\mu$ | $f$   | Structure   | $E_{\text{emi}}$ | $\lambda_{\text{emi}}$ | $\mu$ | $f$   |
|-----------|-------------------------|------------------------|-------|-------|-------------|------------------|------------------------|-------|-------|
| C24d3_up1 | 2.23                    | 556                    | 4.52  | 0.173 | C24d3_down1 | 2.32             | 534                    | 4.64  | 0.189 |
| C24d3_up2 | 2.59                    | 480                    | 3.63  | 0.129 | C24d3_down2 | 2.62             | 473                    | 3.68  | 0.134 |
| C24d3_up3 | 2.44                    | 508                    | 1.80  | 0.030 | C24d3_down3 | 2.42             | 512                    | 1.78  | 0.029 |
| C24d3_up4 | 2.20                    | 564                    | 3.06  | 0.078 | C24d3_down4 | 2.13             | 581                    | 2.97  | 0.072 |
